# Supplementary material for: Determinants of Short Interbirth Interval among Reproductive Age Mothers in Arba Minch District, Ethiopia
Source: PubMed Central journal article supplement (PMC4863097; doi:10.1155/2016/6072437), 2016-04-27
Supplement: 6072437.f1.pdf [file 6072437.f1.pdf]

11. Annex A

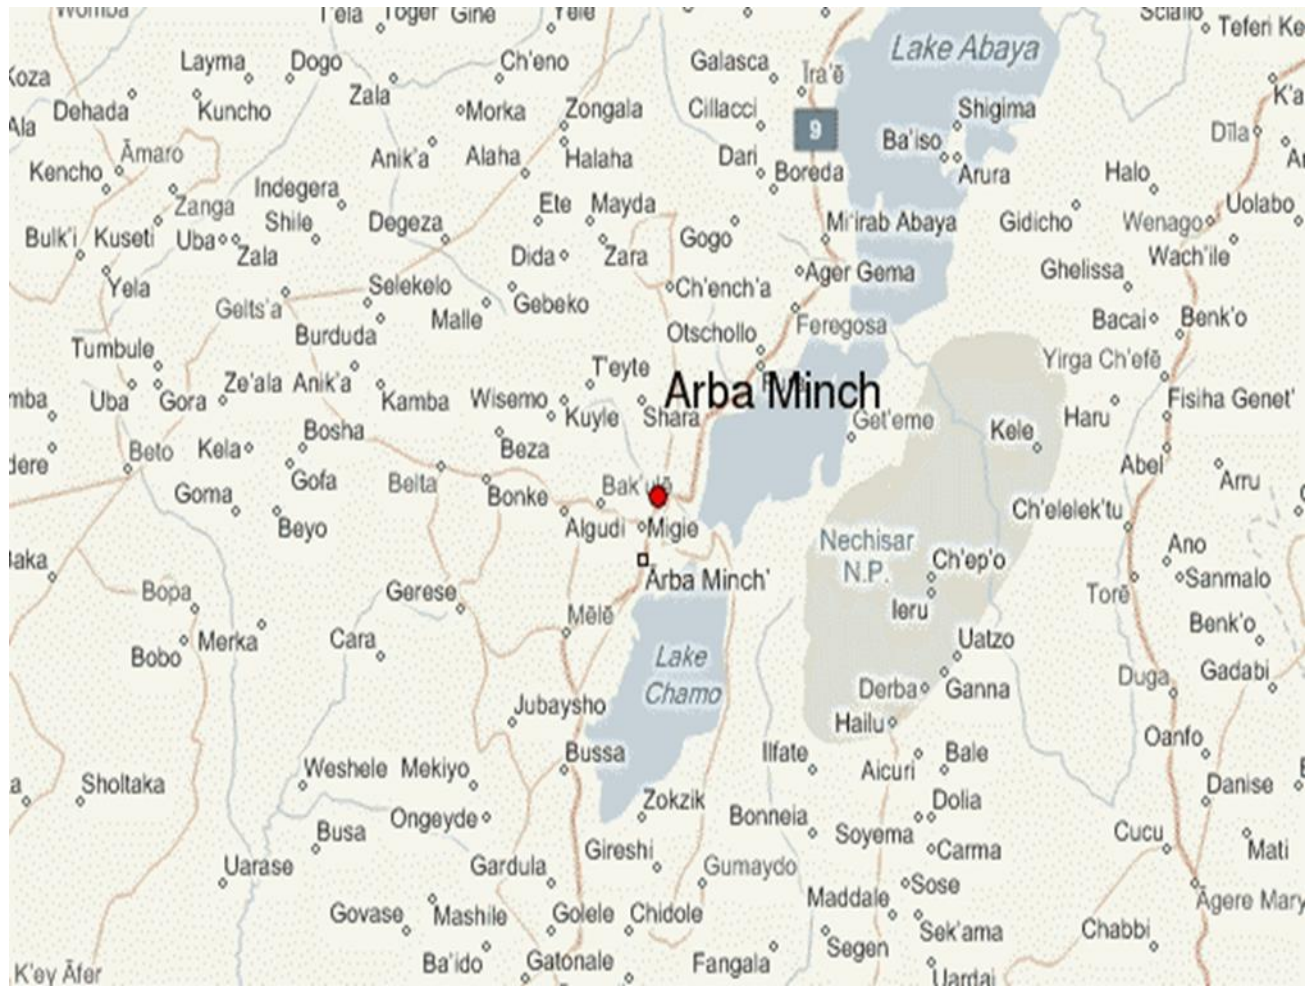

**ARBA MINCH'S LOCATION MAP**

**(Southern Nations, Nationalities, and People's Region, Ethiopia)**

**Annex B: English version questionnaire**

**Structured Questionnaire**

**Arba Minch University College of Medicine and Health Sciences**

**General information:**

Dear Respondent:

My name is \_\_\_\_\_. I came from Arbaminch University where I work as a member of the Research team. This questionnaire is prepared to conduct a study on the socio-demographic, socio-economic and biological factors determining inter birth interval among WCBA in this area. You are selected and included in the study as part of the sample population to complete the questionnaire designed by the researcher. The information obtained in this study will be used only for research purposes. The data you will provide is very helpful to achieve the intended objectives of the study. Any information obtained will be kept strictly confidential.

Involvement in this study is optional and in a voluntary basis and you can drop any individual question or the whole questionnaire. But your participation and contribution in the study is very important to come up with important findings which may help local and national health planners to intervene up on the potential problem.

Do you have any opinion regarding this study?      Do you agree to participate in this study?

**Respondent's Consent**

I confirm that I have been given a full explanation of the study and I have understood all about the information given. Therefore, I voluntarily agree to take part in the study.

Signature: \_\_\_\_\_ Date: \_\_\_\_\_

| <b>Part I: Respondents' Identification</b> |                       |                                                                                            |      |
|--------------------------------------------|-----------------------|--------------------------------------------------------------------------------------------|------|
| S.N                                        | Questions             | Response and Coding                                                                        | Skip |
| 101                                        | Questionnaire code    | -----                                                                                      |      |
| 102                                        | Cluster/Kebele Name   | -----                                                                                      |      |
| 103                                        | House Hold Number     | -----                                                                                      |      |
| 104                                        | Result of visiting    | 1.Completed 2.Household absent<br>3.Refused 4.Dwelling destroyed<br>5.Others(specify)----- |      |
| 105                                        | Number of Visits made | 1.One 2. Two 3.Three or more                                                               |      |

| Part II: Socio-Demographic Characteristics of respondents |                                                            |                                                                                                                                                 |         |
|-----------------------------------------------------------|------------------------------------------------------------|-------------------------------------------------------------------------------------------------------------------------------------------------|---------|
| 201                                                       | How old are you?                                           | _____ Years                                                                                                                                     |         |
| 202                                                       | How is your marital status?                                | 1. Married<br>2. Single<br>3. Divorced<br>4. Widowed<br>5. Separated                                                                            |         |
| 203                                                       | At what age did you get married?                           | _____ Years                                                                                                                                     |         |
| 204                                                       | What is your religion?                                     | 1. Orthodox<br>2. Protestant<br>3. Muslim<br>4. Catholic<br>5. Others (specify)_____                                                            |         |
| 205                                                       | What is your ethnicity?                                    | 1. Gamo<br>2. Amhara<br>3. Welayta<br>4. Zayse<br>5. Oromo<br>7. Others (specify)_____                                                          |         |
| 206                                                       | What is the highest level of school you completed?         | 1. Illiterate<br>2. Able to read and write<br>3. Elementary (1 - 8)<br>4. Secondary (9 -12)<br>5. More than secondary                           |         |
| 207                                                       | What is the highest level of school your husband attended? | 1. Illiterate<br>2. Able to read and write<br>3. Elementary (1- 8)<br>4. Secondary (9 -12)<br>5. More than secondary                            | Skip to |
| 208                                                       | What is your primary Occupation?                           | 1. Employed (governmental /Private )<br>2. House wife<br>3. Merchant<br>4. Student<br>5. Farmer<br>6. Daily laborer<br>7. Others (Specify)_____ |         |
| 209                                                       | What is your husband's primary                             | 1. Employed (governmental /Private)<br>2. Merchant                                                                                              | Skip    |

|                                                   |                                                                                                                        |                                                                       |                 |
|---------------------------------------------------|------------------------------------------------------------------------------------------------------------------------|-----------------------------------------------------------------------|-----------------|
|                                                   | Occupation?                                                                                                            | 3. Student<br>4. Farmer<br>5. Daily laborer<br>6. Others (Specify)___ | to              |
| <b>Part III: Birth History of the respondents</b> |                                                                                                                        |                                                                       |                 |
| 301                                               | How many of your own living children do you have? (Probe: Make sure respondent referring to own, biological children.) | Males ____ Females ____                                               |                 |
| 302                                               | How old were you when you deliver your index child?                                                                    | _____ Years                                                           |                 |
| 303                                               | Did you have antenatal care follow up for your index child?                                                            | 0.Yes<br>1.No                                                         | If 1 go to Q306 |
| 304                                               | If your answer for Q303 is yes how many times did you visit ANC clinic?                                                | _____ time/s                                                          |                 |
| 305                                               | During ANC follow up did you get any information regarding optimal birth interval?                                     | 0.Yes<br>1.No                                                         |                 |
| 306                                               | Where did you deliver your index child?                                                                                | 0.Health facility<br>1.Home                                           |                 |
| 307                                               | What was the Sex of the index child?                                                                                   | 0.Female 1.Male                                                       |                 |
| 308                                               | How was the pregnancy of the index child?                                                                              | 1.Singleton 2.Twins<br>3.Multiple                                     |                 |
| 309                                               | How was the survival status of the index child?                                                                        | 0. Alive 1. Dead                                                      |                 |
| 310                                               | If died, how old was he/she died?                                                                                      | _____ Months                                                          |                 |
| 311                                               | Did you have history of still birth b/n the index and last child?                                                      | 0.Yes 1.No                                                            |                 |
| 312                                               | Did you have history of abortion b/n the index and last child?                                                         | 0.Yes 1.No                                                            |                 |

|     |                                                                                                 |                                                                                     |                 |
|-----|-------------------------------------------------------------------------------------------------|-------------------------------------------------------------------------------------|-----------------|
| 313 | Was the last pregnancy planned?                                                                 | 0.Yes    1.No                                                                       |                 |
| 314 | At the time you became pregnant with the index child did you want to have more children?        | 0. Yes<br>1. No                                                                     | If 1 go to Q318 |
| 315 | If your answer to Q313 is yes, how many additional children                                     | _____                                                                               |                 |
| 316 | If your answer to Q313 is yes, was your preference to become pregnant then or wait until later? | 0.To become pregnant then<br>1.To wait until later                                  |                 |
| 317 | If your preference was to wait until later, how long did you prefer to wait?                    | _____                                                                               |                 |
| 318 | What was the reason to become pregnant then while preferring to wait until later?               | _____                                                                               |                 |
| 319 | In your opinion, how long should the parents wait between one pregnancy and the next?           | _____ months                                                                        |                 |
| 320 | Have you talked to your husband about the number of children you would like to have?            | 0. Yes<br>1. No                                                                     |                 |
| 321 | Who is the ultimate decision maker regarding birth spacing?                                     | 1.Self<br>2.Husband<br>3.Both<br>4.Othere family Members<br>5. Others(Specify)----- |                 |
| 322 | How was the belief of the husband regarding birth spacing?                                      | 0.Supports<br>1.Opposes                                                             |                 |
| 323 | How old were you at delivery of the last child?                                                 | -----                                                                               |                 |
| 324 | Where did you deliver the last child?                                                           | 0. Health facility<br>1. Home                                                       |                 |

|                                                        |                                                                                                                                   |                                                                            |                 |
|--------------------------------------------------------|-----------------------------------------------------------------------------------------------------------------------------------|----------------------------------------------------------------------------|-----------------|
| 325                                                    | What was the length of the birth interval since the previous delivery?                                                            | _____ Months                                                               |                 |
| <b>Part IV: Knowledge of women about Birth spacing</b> |                                                                                                                                   |                                                                            |                 |
| 401                                                    | Have you ever heard about optimal birth interval between two consecutive births?                                                  | 0. Yes<br>1. No                                                            | If I go to Q403 |
| 402                                                    | If your answer to Q401 is yes, what is the optimum number of years between two consecutive births?                                | 1. Below 3 years<br>2. 3 to 5 years<br>3. Above 5 years<br>4. I don't know |                 |
| 403                                                    | Which birth interval do you think have health advantage?                                                                          | 1. Below 3 years<br>2. 3 to 5 years<br>3. Above 5 years<br>4. I don't know |                 |
| 404                                                    | If your answer to Q403 is 3-5 years, for whom do you think have a health advantages?<br><br>(More than one answer possible)       | 1. To the mother<br>2. To the child<br>3. Others(specify)_____             |                 |
| 405                                                    | Which birth interval has health disadvantages?                                                                                    | 1. Below 3 years<br>2. 3 to 5 years<br>3. Above 5 years<br>4. I don't know |                 |
| 406                                                    | If your answer to Q405 is below 3 years, for whom do you think have a health disadvantage?<br><br>(More than one answer possible) | 1. To the mother?<br>2. To the child?                                      |                 |
| <b>Part V: Breast feeding practice of respondents</b>  |                                                                                                                                   |                                                                            |                 |

| S.N                                                                | Questions                                                                                               | Next to Last Child (Response)                                                                    | Skip            |
|--------------------------------------------------------------------|---------------------------------------------------------------------------------------------------------|--------------------------------------------------------------------------------------------------|-----------------|
| 501.                                                               | Did you breast feed for your index child?                                                               | 0. Yes<br>1. No                                                                                  | If 1 go to Q503 |
| 502.                                                               | If your answer to Q501 is yes, for how long did you breast feed?                                        | _____months                                                                                      |                 |
| 503.                                                               | If you stopped breast feeding, what was the reason?                                                     | 1. Child was old enough<br>2. New pregnancy occurred<br>3. I was sick<br>4. Others(specify)_____ |                 |
| 504.                                                               | When do you think breast feeding should stop?                                                           | After _____ months.                                                                              |                 |
| <b>Part VI: Knowledge and Practice of Modern Contraceptive use</b> |                                                                                                         |                                                                                                  |                 |
| S.N                                                                | Questions                                                                                               | Response and Coding                                                                              | Skip            |
| 601                                                                | Do you know any modern female contraceptive method used to limit or avoid pregnancy?                    | 0. Yes<br>1. No                                                                                  | If 1 go to Q603 |
| 602                                                                | If your answer to Q601 is yes, which methods do you know?<br><br>(more than one answer possible)        | 1. Pills<br>2. Injectable<br>3. Condom<br>4. Implants<br>5. IUD<br>6. Others(Specify)-----       |                 |
| 603                                                                | Have you been using any of the modern contraceptive methods before you got pregnant for the last child? | 0. Yes<br>1. No                                                                                  | if 1 go to Q606 |
| 604                                                                | If your answer to Q603 is yes, what was the                                                             | 1. Birth spacing<br>2. Limiting birth                                                            |                 |

|     |                                                                                                                |                                                                                                                                                                            |                 |
|-----|----------------------------------------------------------------------------------------------------------------|----------------------------------------------------------------------------------------------------------------------------------------------------------------------------|-----------------|
|     | purpose?                                                                                                       | 3.Other(specify)_____                                                                                                                                                      |                 |
| 605 | If your answer to Q603 is yes, which modern method/s did you use?                                              | 1. Pills<br>2. Injectable<br>3. Condom<br>4. Implant<br>5. IUCD                                                                                                            |                 |
| 606 | Are you using any of the modern methods now?                                                                   | 0. Yes      1. No                                                                                                                                                          | If 1 go to Q608 |
| 607 | If yes to question 603 or 606, from where have you got family planning service?                                | 1. Health post 2. Health center<br>3. Hospital 4. Private sector                                                                                                           |                 |
| 608 | Did your husband encourage or discourage you to use modern contraception method?                               | 1.Encourage<br>2.Discourage<br>3.Neither<br>4.Don't know                                                                                                                   |                 |
| 609 | If he discouraged you, what was the reason?                                                                    | 1.Change methods<br>2.Stop using FP<br>3.Wait until we have more children<br>4.Don't know<br>5.Other,_____                                                                 |                 |
| 610 | If you were not using any contraceptive method to delay or avoid pregnancy, would you tell me the main reason? | 1. Desire for more children<br>2. Health problem<br>3. Religious reason<br>4. Cultural reason<br>5. Lack of information about contraception<br>6. FP service not available |                 |



|                                                                                                |                                                                                          |                                                                                   |  |
|------------------------------------------------------------------------------------------------|------------------------------------------------------------------------------------------|-----------------------------------------------------------------------------------|--|
|                                                                                                |                                                                                          | 7. Others /specify/ _____                                                         |  |
| <b>Part VII: Attitude of respondents to wards birth spacing, fertility and family planning</b> |                                                                                          |                                                                                   |  |
| 701                                                                                            | Increasing the number of children affects the quality of health care provided to them    | 1.Strongly agree<br>2. Agree<br>3.No opinion<br>4.Disagree<br>5.Strongly disagree |  |
| 702                                                                                            | Compared with small families large families are less happy                               | 1.Strongly agree<br>2. Agree<br>3.No opinion<br>4.Disagree<br>5.Strongly disagree |  |
| 703                                                                                            | Frequent pregnancies may lead to health problems                                         | 1.Strongly agree<br>2. Agree<br>3.No opinion<br>4.Disagree<br>5.Strongly disagree |  |
| 704                                                                                            | A large number of children may lead to parents tiredness and some psychological problems | 1.Strongly agree<br>2. Agree<br>3.No opinion<br>4.Disagree<br>5.Strongly disagree |  |
| 705                                                                                            | Having few children may cause a person to feel economically insecure in old age          | 1.Strongly agree                                                                  |  |

|     |                                                                                                  |                                                                                                          |  |
|-----|--------------------------------------------------------------------------------------------------|----------------------------------------------------------------------------------------------------------|--|
|     |                                                                                                  | <p>2. Agree</p> <p>3.No opinion</p> <p>4.Disagree</p> <p>5.Strongly disagree</p>                         |  |
| 706 | women are as much responsible for planning pregnancies as men                                    | <p>1.Strongly agree</p> <p>2. Agree</p> <p>3.No opinion</p> <p>4.Disagree</p> <p>5.Strongly disagree</p> |  |
| 707 | Parents with fewer children have better economic status                                          | <p>1.Strongly agree</p> <p>2. Agree</p> <p>3.No opinion</p> <p>4.Disagree</p> <p>5.Strongly disagree</p> |  |
| 708 | Women should not limit the number of children they should have as it is against the will of God? | <p>1.Strongly agree</p> <p>2. Agree</p> <p>3.No opinion</p> <p>4.Disagree</p> <p>5.Strongly disagree</p> |  |
| 709 | Having many children is important for the woman to prove her fertility.                          | <p>1.Strongly agree</p> <p>2. Agree</p> <p>3.No opinion</p> <p>4.Disagree</p> <p>5.Strongly disagree</p> |  |

|     |                                                                                             |                                                                                   |  |
|-----|---------------------------------------------------------------------------------------------|-----------------------------------------------------------------------------------|--|
| 710 | The family that has all girls should keep having children until they have at least one boy. | 1.Strongly agree<br>2. Agree<br>3.No opinion<br>4.Disagree<br>5.Strongly disagree |  |
| 711 | Budgeting many children can be harmful to the physical and mental health of the mother      | 1.Strongly agree<br>2. Agree<br>3.No opinion<br>4.Disagree<br>5.Strongly disagree |  |
| 712 | Having many children can be harmful to the physical and mental health of the father         | 1.Strongly agree<br>2. Agree<br>3.No opinion<br>4.Disagree<br>5.Strongly disagree |  |
| 713 | Having many children can be harmful to the health of the new born and the preceding child.  | 1.Strongly agree<br>2. Agree<br>3.No opinion<br>4.Disagree<br>5.Strongly disagree |  |
| 714 | If a woman uses modern contraception her satisfaction with sex may decrease                 | 1.Strongly agree<br>2. Agree<br>3.No opinion<br>4.Disagree                        |  |

|                                                          |                                                                                     |                                                                                                                                                                         |  |
|----------------------------------------------------------|-------------------------------------------------------------------------------------|-------------------------------------------------------------------------------------------------------------------------------------------------------------------------|--|
|                                                          |                                                                                     | 5.Strongly disagree                                                                                                                                                     |  |
| 715                                                      | Contraception use may cause infertility in women                                    | 1.Strongly agree<br>2. Agree<br>3.No opinion<br>4.Disagree<br>5.Strongly disagree                                                                                       |  |
| 716                                                      | Family planning improves the family's standard of living                            | 1.Strongly agree<br>2. Agree<br>3.No opinion<br>4.Disagree<br>5.Strongly disagree                                                                                       |  |
| 717                                                      | Family planning gives parents enough time to take care of the needs of their family | 1.Strongly agree<br>2. Agree<br>3.No opinion<br>4.Disagree<br>5.Strongly disagree                                                                                       |  |
| <b>Part VIII: Household wealth status of respondents</b> |                                                                                     |                                                                                                                                                                         |  |
| 801                                                      | What is the main source of drinking water for the members of your household?        | 1. Piped water<br>2. Protected well<br>3. unprotected well<br>4. protected spring<br>5. unprotected spring<br>6. surface water (River, pond)<br>7. Others(specify)_____ |  |
| 802                                                      | Do you have toilet?                                                                 | 0. Yes<br>1. No                                                                                                                                                         |  |
| 803                                                      | Is the toilet private?                                                              | 0. Yes<br>1.No                                                                                                                                                          |  |
| 804                                                      | What kind of toilet facility do members of                                          | 1. Flush toilet                                                                                                                                                         |  |

|     |                                                                                                           |                                                                                                                                                                                                                                                                                                                                                                                                                                                   |  |
|-----|-----------------------------------------------------------------------------------------------------------|---------------------------------------------------------------------------------------------------------------------------------------------------------------------------------------------------------------------------------------------------------------------------------------------------------------------------------------------------------------------------------------------------------------------------------------------------|--|
|     | your household usually use?                                                                               | <ul style="list-style-type: none"> <li>2. Ventilated improved pit latrine (VIP)</li> <li>3. Pit latrine with slab</li> <li>4. Pit latrine without slab/ open pit</li> <li>5. others (specify _____)</li> </ul>                                                                                                                                                                                                                                    |  |
| 805 | Which of the following assets do you have in your household?                                              | <ul style="list-style-type: none"> <li>1) Electricity</li> <li>2) Watch</li> <li>3) Radio</li> <li>4) Television</li> <li>5) Mobile telephone</li> <li>6) Non-mobile telephone</li> <li>7) Refrigerator?</li> <li>8) Table?</li> <li>9) Chair?</li> <li>10) Sofa</li> <li>11) Bed?</li> <li>12) Cabinet</li> <li>13) Car</li> <li>14) Motorcycle</li> <li>15) Animal-drawn cart</li> <li>16) Bicycle</li> <li>17) Others(specify)_____</li> </ul> |  |
| 806 | <p>What type of fuel do you use for cooking in your household?</p> <p><i>(Circle only one answer)</i></p> | <ul style="list-style-type: none"> <li>1) Electricity</li> <li>2) Biogas</li> <li>3) Kerosene</li> <li>4) Charcoal</li> <li>5) Wood</li> <li>6) Animal dung</li> <li>7) Others (specify)_____</li> </ul>                                                                                                                                                                                                                                          |  |
| 807 | Do have residential home?                                                                                 | <p>0.yes</p> <p>1.No</p>                                                                                                                                                                                                                                                                                                                                                                                                                          |  |
| 808 | Number of members per sleeping room?                                                                      | _____                                                                                                                                                                                                                                                                                                                                                                                                                                             |  |
| 809 | Do you have separate kitchen room?                                                                        | <p>0. Yes</p> <p>1. No</p>                                                                                                                                                                                                                                                                                                                                                                                                                        |  |
| 810 | What is the material of your house floor?<br>(observation)                                                | <ul style="list-style-type: none"> <li>1) Ceramic tiles</li> <li>2) Cement/bricks</li> <li>3) Wood</li> </ul>                                                                                                                                                                                                                                                                                                                                     |  |

|     |                                                                                                |                                                                                                                                                                                         |  |
|-----|------------------------------------------------------------------------------------------------|-----------------------------------------------------------------------------------------------------------------------------------------------------------------------------------------|--|
|     | <i>Circle only one answer</i>                                                                  | 4) Mud<br>5) Other (specify)_____                                                                                                                                                       |  |
| 811 | What is the material of the roof of your house (observation)<br><i>Circle only one answer</i>  | 1) Corrugated iron sheet<br>2) Cement<br>3) Wood<br>4) Plastic sheets<br>5) Thatch/leaf<br>6) Other (specify)_____                                                                      |  |
| 812 | What is the material of the walls of your house (observation)<br><i>Circle only one answer</i> | 1) Wood with mud<br>2) Wood with Cement<br>3) Stone with cement<br>4) Bricks<br>5) Other[specify]_____                                                                                  |  |
| 813 | What is the material of the Windows?<br>(Observation)                                          | 1.Shutters<br>2.Glass<br>3.Screens<br>5.Others(specify)                                                                                                                                 |  |
| 814 | What is the primary source of income for this household?<br><i>Circle only one answer</i>      | 1. Farming, including cash crops<br>2. Livestock<br>3. Employment/salary<br>4. Petty trading (including sale of fire-wood, charcoal, grass)<br>5. Daily labor<br>6.Others(specify)_____ |  |
| 815 | Does this household own land used for agriculture?                                             | 0. Yes<br>1. No                                                                                                                                                                         |  |
| 816 | If yes how much land does your household own?                                                  | ____Hectares                                                                                                                                                                            |  |
| 817 | Does this household own any livestock, herds, or farm animals?                                 | 0. Yes<br>1. No                                                                                                                                                                         |  |
| 818 | How many of the following animals do this household own?<br>[Multiple answer is possible]      | 1. Cows___ 2. Oxen/bulls_____<br>2. Horses/Donkeys/ Mules_____<br>3. Sheep/Goats_____<br>4. Others(specify)_____                                                                        |  |

Annex C: Amharic version Questionnaire

አርባምንጭ ዩኒቨርሲቲ ህክምናና ጤና ሳይንስ ኮሌጅ

በአርባምንጭ ዙሪያ ወረዳ የእናቶች የአራርቆ መወለድ ባህል የሚገጥሙ ጉዳዮች ለማጥናት የተዘጋጀ መጠይቅ

ለተሳታፊዎች የሚገባ አጭር መረጃ

ትወወቅ

ጤና ይስጥልኝ እኔ-----እባላለሁ፡፡ በአርባምንጭ ዩኒቨርሲቲ ህክምናና ጤና ሳይንስ ኮሌጅ የጥናት ቡድን አባል ነኝ፡፡ ጥናቱ በሳይንሳዊ መንገድ በተመረጡ ቀበሌዎችና ቤቶች ላይ የሚከራ ነው፡፡ የጥናቱ ዓላማ እናቶች አራርቆ እንዳይወልዱ የሚገጥሙ ጉዳዮችን ለይቶ የሚጠቅሙ መንገዶችን መጠቀም ነው፡፡

ለዚህ ዓላማ የርስዎን ማህበራዊና ስነ-ህዝባዊ፣ የወሊድ ታሪክ፣ ምጣኔ ሃብታሚ፣ በአራርቆ መወለድና ወሊድ መቆጣጠሪያ ዘዴዎች ያለትን ግንዛቤና አመለካከት እንዲሁም ጠቅ የማጥባት ሁኔታ መረጃ እንሰበስባለን፡፡ በመሆኑም ከዚህ ጥናት የሚገኝ መረጃ ሚዛናዊነቱ የተጠበቀና የጥናቱን ዓላማ ለማሳካት ብቻ የሚያገለግል ሆኖ የሚጠቅመው መረጃ መንግስትና ሌሎች የሚሞከሩት ባለድርሻ አካላት የእናቶች የወሊድ መቆጣጠሪያ አጠቃቀምና የአራርቆ መወለድ ባህል ለማሻሻል የሚጠቅሙ መንገዶችን እንዲቀይሱ ይረዳቸዋል፡፡

በጥናቱ ላይ የሚጠቀሙትን በፍላጎትዎ ሲሆን በመሉም ሆነ በከፊል ያለመተቸኛ መሆንዎ የተጠበቀ ነው፡፡ ጥናቱ ላይ ያለመተቸኛ ወሳኔዎ የተከበረ ከመሆኑም በላይ ምክጥርዎት እንደሚገባኩን እርግጠኛ ይሁኑ፡፡

እስካሁን በተነጋገርን ባቸው ጉዳዮች ላይ ያልገባዎትና ግልፅ ያልሆነ ነገር ካለ መጠየቅ ይችላሉ፡፡ አሁን በጥናቱ ላይ ለመተቸኛ ተስማምተዋል?

አዎን ተስማምቻለሁ----- አልተስማምቻለሁ----- ፈቃደኛ ካለሆኑ ወሳኔያቸውን አክብረው በማጠቃለያ ወደ ቀጣዩ ቤት ይሂዱ፡፡

- 1. መጠይቁን የጥላው ሰው ስም \_\_\_\_\_ ፊርማ \_\_\_\_\_ ቀን \_\_\_\_\_
- 2. ያረጋገጠው ተቆጣጣሪ ሰው ስም \_\_\_\_\_ ፊርማ \_\_\_\_\_ ቀን \_\_\_\_\_

ክፍል I: የጥናቱ ተሳታፊዎች መላያ

| ተ.ቁ                        | ጥያቄዎች               | የመልስ አሜሌቶ                                                                            | አለፍ/ፊ |
|----------------------------|---------------------|--------------------------------------------------------------------------------------|-------|
| 101                        | የጥያቄ መለያ ኮድ         | -----                                                                                |       |
| 102                        | የቀበሌ ስም             | -----                                                                                |       |
| 103                        | የቤት ቁጥር             | -----                                                                                |       |
| 104                        | የጉብኝቱ ወጠኛ           | 1. ተማሪነት<br>2. ቤት የለም<br>3. ተሳታፊ ፈቃደኛ አይደለም<br>4. መኖሪያ ቤት ፈርሷል<br>5. ሌላ (ይገለፅ) ----- |       |
| 105                        | ቤት የተገበገበት ብዛት      | 1. አንድ ጊዜ      2. ሁለት ጊዜ<br>3. ሶስት እና ከዚያ በላይ                                        |       |
| <b>ክፍል II: የተሳታፊዎች መረጃ</b> |                     |                                                                                      |       |
| 201                        | ስንት አመት ነው?         | _____ ዓመት                                                                            |       |
| 202                        | የጋብቻ ሁኔታ            | 1. ያገባች<br>2. ያላገባች<br>3. የተፋታች<br>4. ባል የሞተባት<br>5. ተለያይተው የመኖሩ                     |       |
| 203                        | በስንት አመት ትዳር መረቱ ?  | _____ ዓመት                                                                            |       |
| 204                        | የምን እምነት ተከታይ ነዎት ? | 1. ኦርቶዶክስ<br>2. ፕሮቴስታንት<br>3. መስለም<br>4. ካቶሊክ<br>5. ሌላ (ይገለፅ)                        |       |
| 205                        | ብሄርዎ ምንድን ነው?       | 1. ጋሞ<br>2. አሜራ<br>3. ወላይታ<br>4. ዘይሴ<br>5. ኦሮሞ<br>7. ሌላ (ይገለፅ)                       |       |
| 206                        | የትምህርት ደረጃ          | 1. ያልተማረ<br>2. ማኅበራዊ መግቢያ የምትችል<br>3. ከ1-8ኛ ክፍል<br>4. ከ9-12ኛ ክፍል<br>5. ከ2ኛ ደረጃ በላይ   |       |
| 207                        | የባለቤትዎ የትምህርት ደረጃ   | 1. ያልተማረ<br>2. ማኅበራዊ መግቢያ የምትችል<br>3. ከ1-8ኛ ክፍል<br>4. ከ9-12ኛ ክፍል<br>5. ከ2ኛ ደረጃ በላይ   |       |
| 208                        | የስራ ሁኔታ             | 1. ተቀጣይ (የመንግስት/የግል)                                                                 |       |



|                                      |                                                     |                                                                                      |                    |
|--------------------------------------|-----------------------------------------------------|--------------------------------------------------------------------------------------|--------------------|
|                                      |                                                     | 2. የቤት እመቤት<br>3. ነጋዴ<br>4. ተሜ<br>5. አርሶ አደር<br>6. የቀን ሰራተኛ<br>7. ሌላ (ይገለፅ)          |                    |
| 209                                  | የባለቤት የሰራ ሁኔታ                                       | 1. ተቀጣሪ (የመንግስት/የግል)<br>2. ነጋዴ<br>3. ተሜ<br>4. አርሶ አደር<br>5. የቀን ሰራተኛ<br>6. ሌላ (ይገለፅ) |                    |
| <b>ክፍል III: የጥናቱ ተሳታፊዎች የወላድ ታሪክ</b> |                                                     |                                                                                      |                    |
| 301                                  | በህይወት ያሉ ስንት ልጆች አሉዎት?                              | ወንድ _____ ሴት _____                                                                   |                    |
| 302                                  | የሚኖሩ ልጆቹን የወለዱት በስንት አመት ነው?                        | _____ ዓመት                                                                            |                    |
| 303                                  | የሚኖሩ ልጆቹን እንዳረገዙ የእርግዝና ክትትል አድርገው ነበር ?            | 0. አዎ<br>1. አላደረገም                                                                   | መሳተፊው 1<br>ከሆነ 306 |
| 304                                  | ለጥያቄ ቁጥር 303 መልስዎ አዎ ከሆነ ስንት ጊዜ የእርግዝና ክትትል አድርገዋል? | _____ ጊዜ                                                                             |                    |
| 305                                  | የእርግዝና ክትትል በሚደረጉበት ወቅት አራቆ ስለመሰለድ ትምህርት አግኝተዋል?    | 0. አዎ<br>1. አላገኘሁም                                                                   |                    |
| 306                                  | የሚኖሩ ልጆቹን የት ነው የወለዱት ?                             | 0. ጠፍ ተቋም<br>1. ቤት                                                                   |                    |
| 307                                  | የሚኖሩ ልጆቹ ያታ ምን ነበር?                                 | 0. ሴት            1. ወንድ                                                              |                    |
| 308                                  | በሚኖሩ እርግዝና ስንት ልጆችን ተገላገሉ/ወለዱ?                      | 1. ነጠላ/አንድ            2. መታ<br>3. ብዙ                                                 |                    |
| 309                                  | የሚኖሩ ልጆቹ በህይወት አለ?                                  | 0. በህይወት አለ            1. ሞተዋል                                                       |                    |
| 310                                  | መልስዎ ሞት ከሆነ፣ በስንት ጊዜው ሞተ?                           | _____ ወር                                                                             |                    |
| 311                                  | በሚገኘው ከሰብፊት ባለው ልጆች መሀል ሞቱ የተወለደ ህፃን ነበረዎት?         | 0. አዎ    1. አልነበረኝም                                                                  |                    |
| 312                                  | በሚገኘው ከሰብፊት ባለው ልጆች መሀል ወርጃ አጋጥሞት ነበር?              | 0. አዎ<br>1. አላጋጠመኝም                                                                  |                    |
| 313                                  | ከአሁን በፊት ያለው እርግዝና የታቀደ ነበር?                        | 0. አዎ<br>1. አይደለም                                                                    |                    |

|                                                    |                                                                     |                                                                          |               |
|----------------------------------------------------|---------------------------------------------------------------------|--------------------------------------------------------------------------|---------------|
| 314                                                | የሚጀመሩ ልጆቻችን ነፍሰጠፎ በነበሩበት ወቅት ተጨማሪ ልጅ የመወለድ ፍላጎት ነበረዎት?              | 0. አዎ<br>1. አልነበረኝም                                                      | መልስዎ 1 ወደ 319 |
| 315                                                | ለጥያቄ ቁጥር 314 መልስዎ አዎ ከሆነ ምን ያህል ልጅ እንዲኖርዎት ነበር የፈለጉት?               | _____                                                                    |               |
| 316                                                | ለጥያቄ ቁጥር 314 መልስዎ አዎ ከሆነ ምርጫ ወዲያውኑ ማርገዝ ነበር ወይስ የመቆየት እቅድ ነበረዎት ?   | 0. ወዲያውኑ ማርገዝ<br>1. እስከተወሰነ ጊዜ ድረስ መቆየት                                  |               |
| 317                                                | ልጅ ሳይወለዱ የመቆየት እቅድ ከነበረዎት ለምን ያህል ጊዜ ነበር መቆየት የፈለጉት ?               | _____ ወር                                                                 |               |
| 318                                                | ልጅ ሳይወለዱ የመቆየት እቅድ ከነበረዎት ለምን ነበር ቶሎ ለማርገዝ የወሰኑት?                   | _____                                                                    |               |
| 319                                                | በእርስዎ አስተያየት ወላጆች አንድ ልጅ ከወለዱ በሃላ ሌላ ልጅ ለመወለድ ምን ያህል ጊዜ መቆየት አለባቸው? | _____ ወር                                                                 |               |
| 320                                                | ምን ያህል ልጆች ሊኖርዎት እንደሚፈልጉ ከባለቤትዎ ጋ ተነጋግረው ያወቃሉ?                      | 0. አዎ<br>1. አላወቅም                                                        |               |
| 321                                                | እናንተ ቤተሰብ ወስጥ ስለ አራርቆ መወለድ ወሳኙ ማኑ ው ?                               | 1. እኔ<br>2. ባለቤቴ<br>3. እኔና ባለቤቴ<br>4. ሌላ የቤተሰብ አባል<br>5. ሌላ (ይገለፅ) ----- |               |
| 322                                                | ባለቤትዎ ስለ አራርቆ መወለድ ያላቸው አቋም ምን ነበር ?                                | 0. ይደግፋል<br>1. ይቃወማል                                                     |               |
| 323                                                | የመጠጫ ልጆቻችን ሲወለዱ ስንት አመትዎ ነበር?                                       | -----                                                                    |               |
| 324                                                | የመጠጫ ልጆቻችን የት ነበር የወለዱት ?                                           | 0. ጠፍ ተቋም<br>1. ቤት                                                       |               |
| 325                                                | በመጠጫ ልጆቻችን በእሱ/ሳ ታናሽ ምን ያህል የእድሜ ልዩነት አለ ?                          | _____ ወር                                                                 |               |
| <b>ክፍል IV: እናቶች ስለ አራርቆ መወለድ ያላቸውን እውቀት በተመለከተ</b> |                                                                     |                                                                          |               |
| 401                                                | በሁለት እርግዝና መካከል ምን ያህል የእድሜ ልዩነት መኖር እንዳለበት ሰምተው                    | 0. አዎ                                                                    | If መልስዎ 1     |

|                               |                                                                            |                                                              |                        |
|-------------------------------|----------------------------------------------------------------------------|--------------------------------------------------------------|------------------------|
|                               | ያውቃሉ?                                                                      | 1. ሰምቼ አላውቅም                                                 | ወደ 403                 |
| 402                           | ለጥያቄ ቁጥር 401 መልስዎ አዎ ከሆነ ተመዝግቦ የሆነው እድሜ ስንት ነው ብለው ያስባሉ ?                  | 5. ከሶስት አመት በታች<br>6. ከ3-5 አመት<br>7. ከ5 አመት በላይ<br>8. አላውቀዎም |                        |
| 403                           | ልጆች በምን ያህል እድሜ ተራርቀው ቢወለዱ ለጠፍ ጥሩ ነው ብለው ያስባሉ?                             | 1. ከሶስት አመት በታች<br>2. ከ3-5 አመት<br>3. ከ5 አመት በላይ<br>4. አላውቀዎም | መልስ ከ 2 ወጭ ከሆነ ወደ 405  |
| 404                           | ለጥያቄ ቁጥር 403 መልስዎ 3-5 አመት ከሆነ የጠፍ ጠቀሜታው ለማክው ነው? (ከአንድ በላይ መልስ ይቻላል)       | 1. ለእናት<br>2. ለህፃኑ<br>3. ሌላ (ይገለፅ) _____                     |                        |
| 405                           | ልጆች በየትኛው የእድሜ ልዩነት ቢወለዱ ለጠፍ መጥፎ ነው ብለው ያስባሉ?                              | 1. ከሶስት አመት በታች<br>2. ከ3-5 አመት<br>3. ከ5 አመት በላይ<br>4. አላውቀዎም | መልስዎ ከ 1 ወጭ ከሆነ ወደ 501 |
| 406                           | ለጥያቄ ቁጥር 405 መልስዎ ከ3 አመት በታች ከሆነ ለጠፍ መጥፎ የሚሆነው ለማን ነው? (ከአንድ በላይ መልስ ይቻላል) | 1. ለእናት<br>2. ለህፃን/ለልጅ<br>3. ሌላ (ይገለፅ) -----                 |                        |
| <b>ክፍል V: ጠት ማጥባትን በተመለከተ</b> |                                                                            |                                                              |                        |
| ተ.ቁ                           | ጥያቄዎች                                                                      | የመልስ አሜራሮች                                                   | ይለፍ                    |
| 501.                          | የመጀመሪያ ልጆቻችን ጠት አጥብተዋል?                                                    | 0. አዎ<br>1. ጠት አጥብቼ አላውቅም                                    | መልስዎ 1 ከሆነ ወደ 503      |
| 502.                          | ለጥያቄ ቁጥር 501 መልስዎ አዎ ከሆነ ለምን ያህል ጊዜ ነው ያጠብት ?                              | _____ ወር                                                     |                        |
| 503.                          | ጠት ማጥባት ለማቆም ምክንያትዎ ምን ነበር ?                                               | 1. ልጁ ትልቅሰለሆነ<br>2. ስላረገዝኩ ነበር<br>3. ታምሜ ስለነበር ነው            |                        |

|                                                    |                                                                                    | 4. ሌላ (ይገለፅ) _____                                                                                                  |                       |
|----------------------------------------------------|------------------------------------------------------------------------------------|---------------------------------------------------------------------------------------------------------------------|-----------------------|
| 504.                                               | ጠቅ ማጥባት መቆም ያለበት መቻ ነው ብለው ያስባሉ?                                                   | ከ ____ ወር በኋላ .                                                                                                     |                       |
| <b>ክፍል VI: ዘመናዊ የወሊድ መከላከያ እወቅትና አጠቃቀምን በተመለከተ</b> |                                                                                    |                                                                                                                     |                       |
| ተ.ቁ                                                | ጥያቄ                                                                                | የመልስ አሜሎቅ                                                                                                           | ይለፍ                   |
| 601                                                | ዘመናዊ የሆነ የወሊድ መከላከያ ያወቃሉ?                                                          | 0. አዎ<br>1. አላወቅም                                                                                                   | መልስ 1 ከሆነ ወደ 603      |
| 602                                                | ለጥያቄ ቁጥር 601 መልስዎ አዎ ከሆነ የትኛውን አይነት የወሊድ መከላከያ ዘዴ ያወቃሉ?<br><br>(ከአንድ በላይ መልስ ይቻላል) | 2. በአፍ የመዋጥ እንክብል<br>3. በመራፊ የሚሰጥ/የሚወሰድ<br>4. ኮንዶም<br>5. ከንድ ላይ የሚቆይ<br>6. ማህፀን ወስጥ የሚገባ/የሚቆይ<br>7. ሌላ (ይገለፅ) ----- |                       |
| 603                                                | የመጨረሻ ልጅዎን ከመገንዘብ በፊት ዘመናዊ የወሊድ መከላከያ ይጠቀሙ ነበር?                                    | 0. አዎ<br>1. አልጠቀምም                                                                                                  | መልስ 1 ወደ 606          |
| 604                                                | ለጥያቄ ቁጥር 603 መልስዎ አዎ ከሆነ ለምን ነበር የሚጠቀሙት?                                           | 1. አራርቆ ለመላድ<br>2. መላድ ለማቆም<br>3. ሌላ (ይገለፅ)                                                                         |                       |
| 605                                                | ለጥያቄ ቁጥር 603 መልስዎ አዎ ከሆነ የትኛውን ዘመናዊ የወሊድ መከላከያ ነበር የሚጠቀሙት?                         | 6. እንክብል<br>7. በመራፊ የሚወሰድ<br>8. ኮንዶም<br>9. ከንድ ላይ የሚቆይ<br>10. ማህፀን ወስጥ የሚገባ/የሚቆይ                                    |                       |
| 606                                                | በአሁኑ ሰዓት ዘመናዊ የወሊድ መከላከያ ዘዴ ይጠቀማሉ?                                                 | 0. አዎ 1. አልጠቀምም                                                                                                     | መልስ 1 ወደ 608          |
| 607                                                | ለጥያቄ ቁጥር 603/606 መልስዎ አዎ ከሆነ ከየት አግኝተው ነው የሚጠቀሙት ?                                 | 1. ጠፍ ከላ 2. ጠፍ ጣቢያ<br>3. ሆስፒታል 4. ከግል ጠፍ ተቋም                                                                        |                       |
| 608                                                | ባለቤትዎ ዘመናዊ የወሊድ መከላከያ እንዲጠቀሙ ያበረታቱታል ወይስ አያበረታቱታችኋል?                               | 1. ያበረታታኛል<br>2. አያበረታታኝም/ያጣጥልኛል<br>3. ምንም አይደለም<br>4. አላወቅም                                                        | መልስ ከ 2 ወጭ ከሆነ ወደ 610 |
| 609                                                | የሚበረታቱት ከሆነ ምክንያቱ ምን ነበር ?                                                         | 1. የመከላከያ ዘዴ እንደቀይሮ ስለሚልግ                                                                                           |                       |

|                                                                             |                                                    |                                                                                                                                                                     |  |
|-----------------------------------------------------------------------------|----------------------------------------------------|---------------------------------------------------------------------------------------------------------------------------------------------------------------------|--|
|                                                                             |                                                    | 2. የወሊድ መከላከያ እንዳቆም<br>3. ብዙ ልጆች እንዲኖሩን ስለሚጠይቅ<br>4. አላወቀውም<br>5. ሌላ (ይገለፅ) _____                                                                                   |  |
| 610                                                                         | የወሊድ መከላከያ የማይጠቀሙ ከሆነ ምክንያቱምን ለጎግሮኝ ይችላሉ?          | 8. ብዙ ልጆች መወለድ ስለሚጠይቅ<br>9. የጠፍ ችግር ስላለብኝ<br>10. ሐይማኖቴ ስለሚጠይቅ<br>11. በባህላችን ስለሚጠይቅ<br>12. ስለወሊድ መከላከያ መረጃ ስለሌለኝ<br>13. የቤተሰብ ምጣኔ አገልግሎት ስለሌለ<br>14. ሌላ (ይገለፅ) _____ |  |
| <b>ክፍል VII: አራርቆ መወለድና የቤተሰብ ምጣኔን በተመለከተ ተሳታፊዎች ያላቸውን አመለካከት ለማወቅ የተዘጋጀ</b> |                                                    |                                                                                                                                                                     |  |
| 701                                                                         | የልጆች ቁጥር መበዛት ለልጆች የሚጠበቀውን የጠፍ አገልግሎት ጥራት ይቀንሰዋል?  | 1. በጣም አስማላሁ<br>2. አስማላሁ<br>3. አስተያየት የለኝም<br>4. አልሰማም<br>5. በጣም አልሰማም                                                                                              |  |
| 702                                                                         | ብዙ ቤተሰብ ያላቸው ሰዎች ትንሽ ቤተሰብ ካላቸው ሲወዳደሩ ደስተኞች አይደሉም ? | 1. በጣም አስማላሁ<br>2. አስማላሁ<br>3. አስተያየት የለኝም<br>4. አልሰማም<br>5. በጣም አልሰማም                                                                                              |  |
| 703                                                                         | ቶሎቶሎ ማርገዝ ለጠፍ ችግር ሊያጋልጥ ይችላል ?                     | 1. በጣም አስማላሁ<br>2. አስማላሁ<br>3. አስተያየት የለኝም<br>4. አልሰማም<br>5. በጣም አልሰማም                                                                                              |  |
| 704                                                                         | ብዙ ልጆች መኖራቸው ወላጆች ላይ                               | 1. በጣም አስማላሁ                                                                                                                                                        |  |



|     |                                                       |                                                                    |  |
|-----|-------------------------------------------------------|--------------------------------------------------------------------|--|
|     |                                                       | 5.በጣም አልሰማም                                                        |  |
| 710 | ሴት ልጆች ብቻ ያላቸው ቤተሰቦች ወንድ ልጅ እስኪያገኙ ድረስ መወለድ አለባቸው ?   | 1.በጣም እስማህሁ<br>2. እስማህሁ<br>3.አስተያየት የለኝም<br>4.አልሰማም<br>5.በጣም አልሰማም |  |
| 711 | ብዙ ልጆች መኖራቸው ለእናት አካላዊና ስነ ልቦናዊ ጠፍ ችግር ሊዳርግ ይችላል?     | 1.በጣም እስማህሁ<br>2. እስማህሁ<br>3.አስተያየት የለኝም<br>4.አልሰማም<br>5.በጣም አልሰማም |  |
| 712 | ብዙ ልጆች መኖራቸው ለእባት አካላዊና ስነ ልቦናዊ ጠፍ ችግር ሊዳርግ ይችላል?     | 1.በጣም እስማህሁ<br>2. እስማህሁ<br>3.አስተያየት የለኝም<br>4.አልሰማም<br>5.በጣም አልሰማም |  |
| 713 | ብዙ ልጆች መኖራቸው ለሚጠቀሙ ልጆችና ለተወለዱት ልጆች የጠፍ ችግር ሊያመጣ ይችላል? | 1.በጣም እስማህሁ<br>2. እስማህሁ<br>3.አስተያየት የለኝም<br>4.አልሰማም<br>5.በጣም አልሰማም |  |
| 714 | ዘመናዊ የወላድ መከላከያ የሚጠቀሙ ሴቶች የወሲብ እርካታቸው ሊቀንስ ይችላል?      | 1.በጣም እስማህሁ<br>2. እስማህሁ<br>3.አስተያየት የለኝም<br>4.አልሰማም<br>5.በጣም አልሰማም |  |
| 715 | የወላድ መከላከያ መጠቀም ለመከንኑት ሊዳርግ ይችላል?                     | 1.በጣም እስማህሁ<br>2. እስማህሁ                                            |  |

|                                        |                                                                     |                                                                                                                                   |          |
|----------------------------------------|---------------------------------------------------------------------|-----------------------------------------------------------------------------------------------------------------------------------|----------|
|                                        |                                                                     | 3. አስተያየት የለኝም<br>4. አልሰማም<br>5. በጣም አልሰማም                                                                                        |          |
| 716                                    | የወሊድ መከላከያ መጠቀም የቤተሰብ የኑሮ ደረጃ እንዲሻሻል ይረዳል?                          | 1. በጣም እስማህሁ<br>2. እስማህሁ<br>3. አስተያየት የለኝም<br>4. አልሰማም<br>5. በጣም አልሰማም                                                            |          |
| 717                                    | የቤተሰብ ምጣኔ መጠቀም ለወላጆች በቂ ጊዜ እንዲያገኙ ለቤተሰባቸው ጥሩ እንክብካቤ እንዲያደርጉ ያግዛቸዋል? | 1. በጣም እስማህሁ<br>2. እስማህሁ<br>3. አስተያየት የለኝም<br>4. አልሰማም<br>5. በጣም አልሰማም                                                            |          |
| <b>ክፍል VIII: የቤተሰብ የኑሮ ደረጃን በተመለከተ</b> |                                                                     |                                                                                                                                   |          |
| 801                                    | የቤተሰባችሁ አባላት የመጠጥ ወሃ ከየት ነው የሚገኙት?                                  | 8. የቧንቧ ወሃ<br>9. ከተከለለ የጉድጓድ ወሃ<br>10. ካልተከለለ የጉድጓድ ወሃ<br>11. ከተከለለ ምንጭ<br>12. ካልተከለለ ምንጭ<br>13. የከሬ ወይም የወንዝ ወሃ<br>14. ሌላ (ይገለፁ) |          |
| 802                                    | ሽንት ቤት አላችሁ ?                                                       | 2. አዎ<br>3. የለንም                                                                                                                  | መልስ 0 ወደ |
| 803                                    | ሽንት ቤቱ የራሳችሁ ነው ?                                                   | 0. አዎ<br>1. አይደለም                                                                                                                 |          |
| 804                                    | ምን አይነት ሽንት ቤት ነው የምትጠቀሙት?                                          | 6. ፍላሽ ቶይለት<br>7. ሽንት ሌት ድ አምጥሩ-ሽድ ፒት ላትሪን<br>8. በስላብ የተሰራ ፒት ላትሪን<br>9. ስላብ የሌለው ፒት ላትሪን/ አጥን ፒት<br>10. ሌላ (ይገለፁ)                |          |
| 805                                    | እዚህ ከተጠቀሱት ወስጥ የትኛው በናንተ ቤት ወስጥ አለ ?                                | 18) ኤሌክትሪክ<br>19) ሰዓት<br>20) ሬዲዮ<br>21) ቴሌቪዥን<br>22) የጥባይል ስልክ<br>23) የቤት ስልክ<br>24) ፍሪጅ<br>25) ጠረጤዛ<br>26) ወንበር<br>27) ሶፋ        |          |



|     |                                                            |                                                                                               |  |
|-----|------------------------------------------------------------|-----------------------------------------------------------------------------------------------|--|
|     |                                                            | 28) አልጋ<br>29) ብፌ<br>30) መኪና<br>31) ሞተር ሳይክል<br>32) ጋሪ<br>33) ብስክሌት<br>34) ሌላ (ይገለፅ)          |  |
| 806 | ምግብ ለማበሰያ የምትጠቀሙት ምንድን ው (አንዱን ብቻ ያክብቡ) ?                  | 8) ኤሌክትሪክ<br>9) ባዮጋዝ<br>10) ነጭ ጋዝ<br>11) ከሰል<br>12) እንጨት<br>13) ከብት<br>14) ሌላ (ይገለፅ)          |  |
| 807 | መኖሪያ ቤት አላችሁ                                               | 0. አዎ<br><br>1. የለንም                                                                          |  |
| 808 | በአንድ የመኖሪያ ክፍል ወስጥ ስንት ሰው ነው የሚኖሩት/የሚኖሩት?                  | _____                                                                                         |  |
| 809 | ራሱን የቻለ የምግብ የማበሰያ ክፍል አላችሁ                                | 2. አዎ<br>3. የለንም                                                                              |  |
| 810 | ቤቱ ከምንድን ው የተሰራው (አባክዎን ይመልከቱት) ?<br><br>አንዱን ብቻ ያክብቡ      | 6) ከሴራማክስ<br>7) ከጠብ<br>8) ከእንጨት<br><br>9) ከጭቃ<br><br>10) ሌላ (ይገለፅ) _____                      |  |
| 811 | የቤቱ ጣራ ከምንድን ው የተሰራው (አባክዎን ይመልከቱት) ?<br><br>አንዱን ብቻ ያክብቡ  | 7) ከቆርቆሮ<br>8) ከሲሚንት<br>9) ከእንጨት<br><br>10) ከፕላስቲክ<br><br>11) ከቅጠል<br><br>12) ሌላ (ይገለፅ) _____ |  |
| 812 | የቤቱ ወለል ከምንድን ው የተሰራው (አባክዎን ይመልከቱት) ?<br><br>አንዱን ብቻ ያክብቡ | 6) ከጭቃና ከእንጨት<br>7) ከሲሚንትና እንጨት<br>8) ከድንጋይ እና ሲሚንት<br>9) ከጠብ<br>10) ሌላ (ይገለፅ)                |  |
| 813 | የቤታችሁ መስኮት ከምንድን ነው የተሰራው                                  | 1. ከጠጣሪ የተሰራ መዝገያ<br>2. መስተዋት<br>3. መጋረጃ አይነት<br>5. ሌላ (ይገለፅ) -----                           |  |
| 814 | ዋናው የቤተሰባችሁ የገቢ ምንጭ ምንድን ወ?                                | 1. እርሻ<br>2. እንስሳት እርባታ                                                                       |  |

|     |                                                                   |                                                                                              |  |
|-----|-------------------------------------------------------------------|----------------------------------------------------------------------------------------------|--|
|     | አንድ መዳሰ ብቻ ያከብሩ                                                   | 3. የቅጥር ደመወዝ<br>4. ጥቃቅን ንግድ<br>5. የቀን ስራ<br>6. ሌላ (ይገለፅ) _____                               |  |
| 815 | የእርሻ መሬት አላችሁ?                                                    | 2. አዎ<br>3. የለንም                                                                             |  |
| 816 | ምን ያህል ሄክታር መሬት አላችሁ?                                             | _____ ሄክታር                                                                                   |  |
| 817 | የቤት እንስሳት አላችሁ?                                                   | 8. አዎ<br>9. የለንም                                                                             |  |
| 818 | ምን ያህል የሚከተሉት የቤት እንስሳት በቤት ውስጥ ይገኛሉ?<br>[ከአንድ በላይ መዳሰ መግለጽ ይቻላል] | 5. ላም _____<br>6. በሬ _____<br>7. ፈረስ/አህያ/ በቅሎ _____<br>8. በግ/ፍየል _____<br>9. ሌላ (ይገለፅ) _____ |  |

## Annex D: English version Focus group discussion guide

### Introduction

First of all I would like to extend my gratitude to all of you for being willing to come here and participate on this discussion. My name is----- and my colleagues' name is-----We came from Arba Minch University to conduct a research on factors contributing to inter birth interval among mothers. Thus, the purpose of this group discussion is to assess your overall knowledge and attitude about family planning and birth spacing.

For the sake of accuracy and efficiency, we will take notes and tape record, unless any one has any objections. In this group everybody should feel free to talk. Each and every opinion is important and wanted. In this group there are no rights or wrong answers.

Even though your participation is important for this study, you have the right to refuse to answer any questions and to end the discussion at any time if you find it necessary to do so.

Location of Discussion-----

Date of Discussion-----Time started-----Timed finished-----

Moderator's Name-----

Assistant Moderator (note taker's) name-----

Number of Participants-----

## **I. Introduction**

At this point, we would like to ask you to introduce yourself to the rest of the group. Let us start with the research team and each of you will tell me your name, how long you have lived in this area and your job.

### **Perceived Knowledge of women about birth spacing and family planning**

1. Have you ever heard about the word birth spacing? Probe
2. Have you ever heard about optimal birth spacing between two consecutive live births?
3. What does short birth interval mean to you?
4. How do you explain the advantage and disadvantage of short birth spacing to the family?
5. How do you explain the advantage and disadvantage of optimal birth spacing to the family?
6. Who is the ultimate decision maker about your family planning utilization and birth spacing practice?
7. What are the reasons for having short birth intervals
8. Have you ever heard of family planning?
9. What are the methods used for delaying or avoiding pregnancy?
10. Have you been using any of the modern contraceptive methods? If not why?
11. Explain how your husband, relatives and your religion affect your decision to utilize contraceptive method and birth spacing.

12. Do you have any more issues, questions, comments that you want to add? Thank you!

**Annex E: Amharic version Focus group discussion guide for mothers**

**I. ለእናቶች እና አባቶች የተዘጋጁ የመወያያ ጥያቄዎች**

ውይይት የተደረገበት ቀበሌ ስም-----ውይይት የተካሄደበት ቀን-----

ለውይይት የወሰደበት ጊዜ-----የአወያይ ስም-----

የአወያይ አጋዥ ስም-----የተወያዮች ብዛት-----

| የተወያይ ኮድ | እድሜ | በማህበረሰቡ ያላት አስተዋፅኦ | የትምህርት ደረጃ | ስራ | የልጆች ቢዛት |
|----------|-----|--------------------|------------|----|----------|
|          |     |                    |            |    |          |
|          |     |                    |            |    |          |
|          |     |                    |            |    |          |
|          |     |                    |            |    |          |
|          |     |                    |            |    |          |
|          |     |                    |            |    |          |
|          |     |                    |            |    |          |
|          |     |                    |            |    |          |
|          |     |                    |            |    |          |
|          |     |                    |            |    |          |

1. በእናንተ አስተሳሰብ አራርቆ ልጆች መውለድ ማለት ምን ማለት ነው?
2. በእናንተ አመለካከት ልጆች በምን ያህል ጊዜ ሉይነት ሲወለዱ ነው ጤነኛ/ጥሩ የሚባለው?
3. በእናንተ አመለካከት ልጆች በምን ያህል ጊዜ ሉይነት ሲወለዱ ነው አጭር የሚባለው?
4. በእናንተ አመለካከት ልጆች በአጭር ጊዜ(ከሰወስት ዓመት በታች) ሉይነት ቢወለዱ ጉዳቱ ምንድን ነው?
5. በእናንተ አመለካከት ልጆች በሶስት እና ከዚያ በላይ የጊዜ ሉይነት ቢወለዱ ጉዳቱ ምንድን ነው?
6. ወላጆች በአጭር ጊዜ ሉይነት እንዲወለዱ የሚያደርጉዎቸው ምክንያቶች ምንድን ናቸው?
7. በቤታቸው ውስጥ ልጆች በምን ያህል ጊዜ ሉይነት መወለድ እንዳለባቸው የመጨረሻ ውሳኔ የሚሰጠው ማነው?
8. ስለ የቤተ ሰብ ምጣኔ ስመታቸው ታውቃላቸው?
9. ወሊድ ለመቆጣጠር የምንጠቀምባቸው ዘመናዊ ዘዴዎች ሊነግሩኝ ይችላሉ?
10. የመጨረሻው ልጅዎ ከማርገዝዎ በፊት ዘመናዊ የወሊድ መቆጣጠሪያ ዘዴ ተጠቅመው ነበር? ካልተጠቀሙ ለምን?

11. አራርቆ በመውለድ እና ዘመናዊ የወሊድ መቆጣጠሪያ ዘዴ በመጠቀም ዙሪያ የባለ ቤትዎ፣ ቤተሰቦችዎ፣

ሀይማኖትዎ እንዲሁም የአከባቢው ባህል ተፅእኖ ምን ይመስላል?

12. በመጨረሻ ጥያቄ ወይም አስተያየት ካላችሁ? አመሰግናለሁ።

**Declaration**

We, the under signed hereby, declare that this research is our original work and all sources of material used for this work and all the people and institutions that gave support have been duly acknowledged.

**Principal investigator:** Desta Hailu (BSc, MSc) Signature: ----- Date: -----

**Co-Investigator:** Teklemariam Gultie (BSc, MSc) Signature: ----- Date: -----

**AMU, CMHS Research coordinator:**

Name----- signature----- Date: -----

**AMU, Research directorate director:**

Name----- signature----- Date: -----
